# Supplementary material for: Molecular Epidemiology of Staphylococcus aureus Skin and Soft Tissue Infections in the Lao People’s Democratic Republic
Source: PubMed Central journal article supplement (PMC5544078; doi:10.4269/ajtmh.16-0746), 2017-05-30
Supplement: tpmd160746.SD1.pdf [file tpmd160746.SD1.pdf]

SUPPLEMENTAL TABLE 1

Staphylococcal protein A gene (*spa*) types by lineage for all isolates  
(N = 96)

| Lineage            | <i>spa</i> type | No. of isolates |
|--------------------|-----------------|-----------------|
| CC121-MSSA         | t159            | 18              |
|                    | t7002           | 10              |
|                    | t3204           | 6               |
|                    | t4499           | 2               |
|                    | t272            | 1               |
|                    | t610            | 1               |
| CC1-MSSA           | t645            | 1               |
|                    | t127            | 4               |
|                    | t114            | 1               |
|                    | t3963           | 1               |
|                    | t5445           | 1               |
|                    | t14829          | 1               |
|                    | t14830          | 1               |
|                    | t14832          | 1               |
|                    | t14833          | 1               |
|                    | t14834          | 1               |
| CC6-MSSA           | t701            | 5               |
|                    | t304            | 1               |
| ST2250-MSSA        | t5787           | 2               |
|                    | t6675           | 2               |
| ST2250-MRSA-IV     | t7960           | 1               |
| CC1223-MSSA        | Non-typeable*   | 1               |
| ST2885-MSSA        | t13849          | 4               |
|                    | t14831          | 1               |
| ST2885-MRSA-V      | t13849          | 1               |
| CC88-MSSA          | t186            | 1               |
|                    | t1376           | 1               |
|                    | t4494           | 1               |
|                    | t13981          | 1               |
|                    | t14043          | 1               |
|                    | t034            | 4               |
| CC398-MSSA         | t034            | 1               |
| CC188-MSSA         | t2883           | 2               |
|                    | t189            | 1               |
| CC97-MSSA          | t13969          | 1               |
|                    | t267            | 1               |
|                    | t521            | 1               |
|                    | t11511          | 1               |
| CC20-MSSA          | t2919           | 1               |
|                    | Non-typeable†   | 1               |
| ST239-MRSA-III     | t4835           | 1               |
|                    | t4854           | 1               |
| ST59/952-MRSA-V(T) | t437            | 2               |
| CC15-MSSA          | t774            | 1               |
| ST834-MSSA         | t213            | 1               |
| ST2482-MSSA        | t9805           | 1               |
| ST1541-MSSA        | t13785          | 1               |

*spa* = staphylococcal protein A gene; CC = clonal complex; ST = multilocus sequence type; MSSA = methicillin-sensitive *Staphylococcus aureus*; MRSA = methicillin-resistant *S. aureus*.

\* A *spa* type could not be assigned by the Ridom *spa* server because of a sequence polymorphism in the consensus region.

† A *spa* type could not be assigned by the Ridom *spa* server because of the insertion of irregular-sized repeat sequences.

SUPPLEMENTAL TABLE 2  
Virulence markers by lineage for all isolates (N = 96)

|                        | Total     | PVL       | PVL +<br>abscess | tst      | cap5      | cap8      | etA      | etB      | sea       | seb       | sec/I     | sed      | seh       | sek/q     | egc       | agrI      | agrII    | agrIII    | agrIV     | agr-     | scn      | scn+<br>sak | scn+<br>sak+<br>sea | scn+<br>chp | scn+<br>chp+<br>sak | IEC-     |   |
|------------------------|-----------|-----------|------------------|----------|-----------|-----------|----------|----------|-----------|-----------|-----------|----------|-----------|-----------|-----------|-----------|----------|-----------|-----------|----------|----------|-------------|---------------------|-------------|---------------------|----------|---|
| CC121-<br>MSSA         | 39        | 38        | 17               | 2        |           | 39        | 2        | 1        |           | 37        |           | 1        |           |           | 39        |           |          |           |           |          | 39       |             |                     | 38          |                     |          | 1 |
| CC1-<br>MSSA           | 12        | 8         | 4                | 1        |           | 12        |          |          | 4         | 1         | 8         |          | 12        | 9         |           |           |          | 12        |           |          |          |             |                     | 8           | 4                   |          |   |
| CC6-<br>MSSA           | 6         |           |                  |          |           | 6         |          |          | 6         |           |           |          |           | 4         | 6         |           |          |           |           |          |          |             |                     | 6           |                     |          |   |
| ST2250-<br>MSSA        | 4         |           |                  |          |           |           |          |          |           |           |           |          |           |           |           |           |          |           |           | 4        |          |             | 3                   |             |                     |          | 1 |
| CC1223-<br>MSSA        | 1         |           |                  |          |           |           |          |          |           |           |           |          |           |           | 1         |           |          |           |           |          | 1        | 1           |                     |             |                     |          |   |
| ST2885-<br>MSSA        | 5         |           |                  |          | 5         |           | 5        |          |           |           |           |          |           |           |           |           |          |           | 5         |          |          | 5           |                     |             |                     |          |   |
| CC88-<br>MSSA          | 5         | 2         |                  | 1        |           | 5         |          |          |           |           | 1         |          |           |           |           |           |          | 5         |           |          |          |             | 2                   |             |                     |          | 3 |
| CC398-<br>MSSA         | 4         | 4         | 3                |          | 4         |           |          |          |           |           |           | 1        |           |           |           | 4         |          |           |           |          |          |             |                     |             |                     |          | 4 |
| CC188-<br>MSSA         | 4         |           |                  |          |           | 4         | 1        |          |           | 1         |           |          |           |           |           | 4         |          |           |           |          |          |             | 3                   |             |                     |          | 1 |
| CC97-<br>MSSA          | 3         |           |                  |          | 3         |           |          |          |           |           |           |          |           |           |           | 3         |          |           |           |          |          |             | 3                   |             |                     |          |   |
| CC20-<br>MSSA          | 2         |           |                  |          | 2         |           |          |          |           |           |           |          |           |           | 2         | 2         |          |           |           |          |          |             |                     |             |                     |          | 2 |
| CC15-<br>MSSA          | 1         |           |                  |          |           | 1         |          |          |           |           |           |          |           |           |           |           | 1        |           |           |          |          |             |                     |             | 1                   |          |   |
| ST834-<br>MSSA         | 1         |           |                  |          |           | 1         |          |          |           |           |           |          |           |           |           | 1         |          |           |           |          |          |             | 1                   |             |                     |          |   |
| ST2482-<br>MSSA        | 1         | 1         | 1                |          | 1         |           |          |          |           |           |           |          |           |           |           |           | 1        |           |           |          |          |             | 1                   |             |                     |          |   |
| ST1541-<br>MSSA        | 1         |           |                  | 1        |           | 1         |          |          |           |           | 1         |          |           |           |           |           |          |           | 1         |          |          |             |                     |             |                     |          | 1 |
| ST239-<br>MRSA-III     | 2         |           |                  |          |           | 2         |          |          | 2         |           |           |          |           | 2         | 2         |           |          |           |           |          |          |             | 2                   |             |                     |          |   |
| ST59/952-<br>MRSA-V(T) | 2         | 2         | 2                |          |           | 2         |          |          |           | 2         |           |          |           | 2         | 2         |           |          |           |           |          |          |             |                     |             | 2                   |          |   |
| ST2250-<br>MRSA-IV     | 1         |           |                  |          |           |           |          |          |           |           |           |          |           |           |           |           |          |           |           | 1        |          | 1           |                     |             |                     |          |   |
| ST2885-<br>MRSA-V      | 1         |           |                  |          | 1         |           | 1        |          |           |           |           |          |           |           |           |           |          |           | 1         |          |          | 1           |                     |             |                     |          |   |
| CC398-<br>MRSA-V       | 1         | 1         | 1                |          | 1         |           |          |          |           |           |           |          |           |           |           | 1         |          |           |           |          |          |             |                     |             |                     |          | 1 |
| <b>Total</b>           | <b>96</b> | <b>56</b> | <b>28</b>        | <b>5</b> | <b>17</b> | <b>73</b> | <b>9</b> | <b>1</b> | <b>12</b> | <b>41</b> | <b>10</b> | <b>2</b> | <b>12</b> | <b>17</b> | <b>42</b> | <b>25</b> | <b>2</b> | <b>17</b> | <b>46</b> | <b>6</b> | <b>9</b> | <b>58</b>   | <b>12</b>           | <b>3</b>    | <b>11</b>           | <b>3</b> |   |

CC = clonal complex; ST = multilocus sequence type; MSSA = methicillin-sensitive *Staphylococcus aureus*; MRSA = methicillin-resistant *S. aureus*; PVL = Pantone-Valentine leukocidin; PVL + abscess = Pantone-Valentine leukocidin genes detected and abscesses documented for clinical presentation; tst = toxic shock syndrome toxin-1 gene; cap5/8 = capsule serotype 5 or 8 genes; etA/B = exfoliative toxin a or b genes; sea/b/c/d/h/k/l/q = staphylococcal enterotoxin a/b/c/d/h/k/l/q genes; egc = enterotoxin gene cluster (seg/l/m/n/o/u); agrI-IV = accessory gene regulator groups I-IV genes; agr- = accessory gene regulator genes not detected; scn = staphylococcal complement inhibitor gene; sak = staphylokinase gene; chp = chemotaxis inhibiting protein gene; IEC- = immune evasion cluster genes (scn, sak, chp, sea) not detected.
